# Supplementary material for: Regulation of Epstein-Barr Virus Minor Capsid Protein BORF1 by TRIM5α
Source: MDPI journal article supplement (doi:10.3390/ijms232315340), 2022-12-05
Supplement: s1 [file s1]

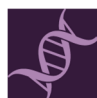

## Supplementary Materials

**Table S1.** Plasmid construction methods.

| Plasmid                                                 | Construct Method                                                                                                                                                                                                                                                                                                                                                                                                                                                                        |
|---------------------------------------------------------|-----------------------------------------------------------------------------------------------------------------------------------------------------------------------------------------------------------------------------------------------------------------------------------------------------------------------------------------------------------------------------------------------------------------------------------------------------------------------------------------|
| <b>pFlag-BORF1-K196R, K202R</b>                         | Expresses Flag-tagged BORF1 protein with K196R and K202R mutations. BORF1-K196R, K202R DNA segment was first amplified by PCR using primers BamHI-BORF1-F, BORF1-K196RK202R-R and BORF1-K196RK202R-F, XhoI-BORF1-R, with pFlag-BORF1 as a template. PCR products were then ligated and elongated using primers BamHI-BORF1-F and XhoI-BORF1-R, and inserted into the BamHI and XhoI sites of pCMV-Tag2B (Agilent Technologies).                                                         |
| <b>pFlag-BORF1-K2R, K196R, K202R</b>                    | Expresses Flag-tagged BORF1 protein with K2R, K196R, and K202R mutations. BORF1-K2R, K196R, K202R DNA segment was amplified by PCR using primers BamHI-BORF1-K2R-F and XhoI-BORF1-R, with pFlag-BORF1-K196RK202R as a template, then inserted into the BamHI and XhoI sites of pCMV-Tag2B (Agilent Technologies).                                                                                                                                                                       |
| <b>pFlag-BORF1-K2R, K196R, K202R, K214R, K222R</b>      | Expresses Flag-tagged BORF1 protein with K2R, K196R, K202R, K214R and K222R mutations. BORF1-K2R, K196R, K202R, K214R, K222R DNA segment was first amplified by PCR using primers BamHI-BORF1-F, BORF1-K214RK222R-R and BORF1-K214RK222R-F, XhoI-BORF1-R, with pFlag-BORF1-K2R, K196R, K202R as a template. PCR products were then ligated and elongated using primers BamHI-BORF1-F and XhoI-BORF1-R, and inserted into the BamHI and XhoI sites of pCMV-Tag2B (Agilent Technologies). |
| <b>pFlag-Ub-K48R</b>                                    | Expresses Flag-tagged ubiquitin protein with K48R mutation. Ub-K48R DNA segment was first amplified by PCR using primers Ub-F-EcoRI, Ub-K48R-R and Ub-R-HindIII, Ub-K48R-F, with pFlag-Ub [37] as a template. PCR products were then ligated and elongated using primers Ub-F-EcoRI and Ub-R-HindIII, and inserted into the EcoRI and HindIII sites of pCMV-Tag2B (Agilent Technologies).                                                                                               |
| <b>pFlag-Ub-K48RK63R</b>                                | Expresses Flag-tagged ubiquitin protein with K48R and K63R mutations. Ub-K48RK63R DNA segment was amplified by PCR using primers Ub-F-EcoRI and UbK63R-R-HindIII, with pFlag-Ub as a template. PCR products were then inserted into the EcoRI and HindIII sites of pCMV-Tag2B (Agilent Technologies).                                                                                                                                                                                   |
| <b>pFlag-Ub-6KR (K6R, K11R, K27R, K29R, K48R, K48R)</b> | Expresses Flag-tagged ubiquitin protein with 6 lysine mutations (K6R, K11R, K27R, K29R, K48R, K48R). Ub-6KR DNA segment was first amplified by PCR using primers UbK6RK11R-F-EcoRI, UbK27RK29R-R and UbK27RK29R-F, UbK63R-R-HindIII, with pFlag-Ub-K48RK63R as a template. PCR products were then ligated and elongated by primers UbK6RK11R-F-EcoRI and UbK63R-R-HindIII, and inserted into the EcoRI and HindIII sites of pCMV-Tag2B (Agilent Technologies).                          |
| <b>pFlag-UbΔK</b>                                       | Expresses Flag-tagged ubiquitin protein with all 7 lysine mutations (K6R, K11R, K27R, K29R, K33R, K48R, K48R). UbΔK DNA segment was first amplified by PCR using primers UbK6RK11R-F-EcoRI, UbK33R-R and UbK33R-F, UbK63R-R-HindIII, with pFlag-Ub-6KR as a template. PCR products were then ligated and elongated by primers UbK6RK11R-F-EcoRI and UbK63R-R-HindIII, and inserted into the EcoRI and HindIII sites of pCMV-Tag2B (Agilent Technologies).                               |
| <b>pFlag-Ub-K48</b>                                     | Expresses Flag-tagged ubiquitin protein with all lysine mutations except K48. Ub-K48 DNA segment was first amplified by PCR using primers UbK6RK11R-F-EcoRI, UbK48-R and UbK48-F, UbK63R-R-HindIII, with pFlag-UbΔK as a template. PCR products were then ligated and elongated by primers UbK6RK11R-F-EcoRI and UbK63R-R-HindIII, and inserted into the EcoRI and HindIII sites of pCMV-Tag2B (Agilent Technologies).                                                                  |
| <b>pFlag-Ub-K63</b>                                     | Expresses Flag-tagged ubiquitin protein with all lysine mutations except K63. Ub-K63 DNA segment was amplified by PCR using primers UbK6RK11R-F-EcoRI and UbK63R-HindIII, with pFlag-UbΔK as a template. PCR products were then inserted into the EcoRI and HindIII sites of pCMV-Tag2B (Agilent Technologies).                                                                                                                                                                         |

Table S2. Primers used in the construction of plasmids in Table S1.

| Primer                    | Sequence                                                                   |
|---------------------------|----------------------------------------------------------------------------|
| <b>BamHI-BORF1-F</b>      | 5'-CGCGGATCCATGAAGGTCCAGGGGTC-3'                                           |
| <b>XhoI-BORF1-R</b>       | 5'-CCGCTCGAGCTAGAGAATCACCTC-3'                                             |
| <b>BORF1-K196RK202R-F</b> | 5'-GAGAATATAAGGAGCACCTATCTGAATAGAATCACCAC-3'                               |
| <b>BORF1-K196RK202R-R</b> | 5'-GTGGTGATTCTATTTCAGATAGGTGCTCCTTATATTCTC-3'                              |
| <b>BORF1-K2R-F</b>        | 5'-CGCGGATCCATGAGGGTCCAGGGGTCC-3'                                          |
| <b>BORF1-K214RK222R-F</b> | 5'-GTGGTCAGCAGGGCCATCCCTCGCAGCACCGTCAGGGTGACGGTG-3'                        |
| <b>BORF1-K214RK222R-R</b> | 5'-CACCGTCACCCTGACGGTGCTGCGAGGGATGGCCCTGCTGACCAC-3'                        |
| <b>Ub-F-EcoRI</b>         | 5'-CCGGAATTCATGCAGATCTTCGTCAAGAC-3'                                        |
| <b>Ub-R-HindIII</b>       | 5'-CCCAAGCTTTCAACCACCTCTTAGTCTTA-3'                                        |
| <b>Ub-K48R-F</b>          | 5'-CTTTGCCGGTAGGCAGCTCGAG                                                  |
| <b>Ub-K48R-R</b>          | 5'-CTCGAGCTGCCTACCGGCAAAG                                                  |
| <b>UbK63R-R-HindIII</b>   | 5'-CCCAAGCTTTCAACCACCTCTTAGTCTTAAGACAAGATGTAAGGTCGACTCCCTC<br>TGAATGTTG-3' |
| <b>UbK6RK11R-F-EcoRI</b>  | 5'-CCGGAATTCATGCAGATCTTCGTCTAG GACGTTAACCGGTAGAACCATAAC-3'                 |
| <b>UbK27RK29R-F</b>       | 5'-GAAAACGTTAGGGCTAGGATTCAAGAC-3'                                          |
| <b>UbK27RK29R-R</b>       | 5'-GTCTTGAATCCTAGCCCTAACGTTTTC-3'                                          |
| <b>UbK33R-F</b>           | 5'-ATTCAAGACAGGGAAGGCATTC-3'                                               |
| <b>UbK33R-R</b>           | 5'-GAATGCCTTCCCTGTCTTGAAT-3'                                               |
| <b>UbK48-F</b>            | 5'-CTTTGCCGGTAAGCAGCTCGAG-3'                                               |
| <b>UbK48-R</b>            | 5'-CTCGAGCTGCTTACCGGCAAAG-3'                                               |
| <b>UbK63-R-HindIII</b>    | 5'-CCCAAGCTTTCAACCACCTCTTAGTCTTAAGACAAGATGTAAGGTCGACTCCTTCT<br>GAATGTTG-3' |
